# Supplementary figures and images for: Consumptive Hypothyroidism due to Hepatic Hemangiomas: A Case Series and Review of the Literature
Source: PubMed Central journal article supplement — JPGN Rep. 2022 Nov 8;3(4):e270. doi: 10.1097/PG9.0000000000000270 (PMC10158424; doi:10.1097/pg9.0000000000000270), 2022-11-08

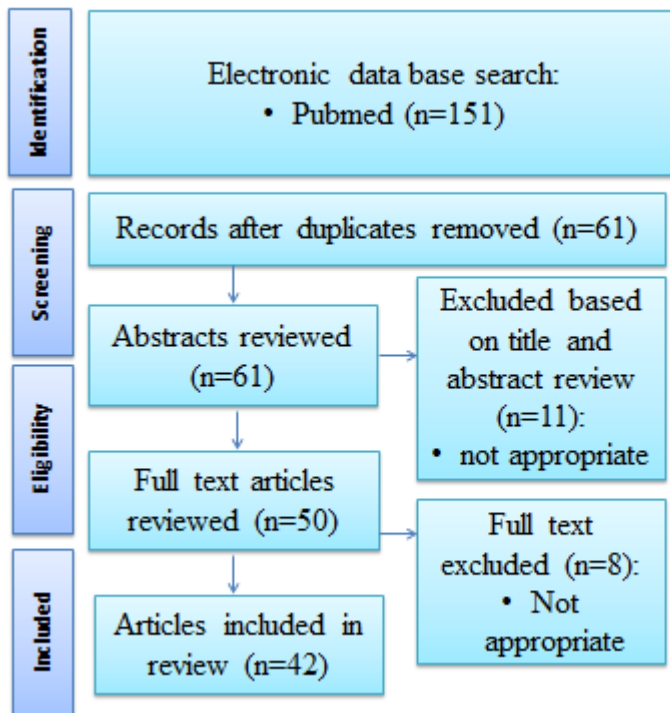

**Figure S1.** Flowchart of literature search results (Supplementary file on line only)

Supplement: pg9-3-e270-s001.pdf [file pg9-3-e270-s001.pdf]
